# Supplementary material for: Transparent and iridescent photonic films with intelligent responsive ability based on electrospun core–shell nanofibrous membranes
Source: Royal Society of Chemistry journal article supplement (doi:10.1039/d3sm00631j), 2023-01-01
Supplement: d3sm00631j1.pdf [file d3sm00631j1.pdf]

# Transparent and Iridescent Photonic Films with Intelligent Responsive Ability based on Electrospun Core-Shell Nanofibrous Membranes

*Yang Shen<sup>a</sup>, Hao Luo<sup>a</sup>, Jiazi Hou<sup>\*a</sup>, Fengwei Xie<sup>b</sup>*

<sup>a</sup> Key Laboratory of Automobile Materials of Ministry of Education, College of Materials Science and Engineering, Jilin University, Changchun 130025, China.

<sup>b</sup> School of Engineering, Newcastle University, Newcastle upon Tyne, NE1 7RU,  
United Kingdom

\* Corresponding author at [houjiazi@jlu.edu.cn](mailto:houjiazi@jlu.edu.cn)

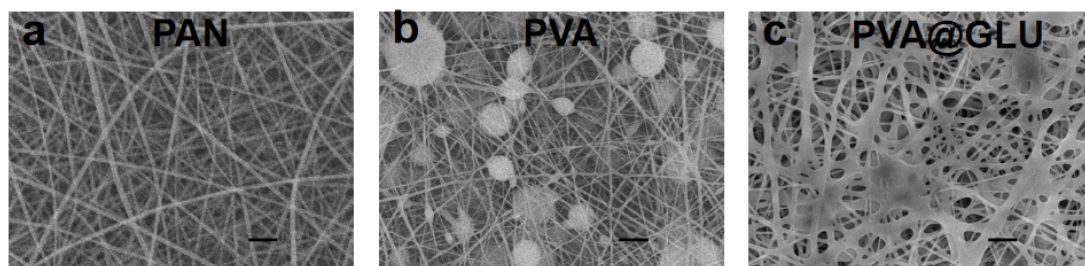

**Figure S1.** SEM images of (a) PAN, (b) PVA, (c) PVA@GLU electrospun membranes. (Scale bar: 1000 nm).

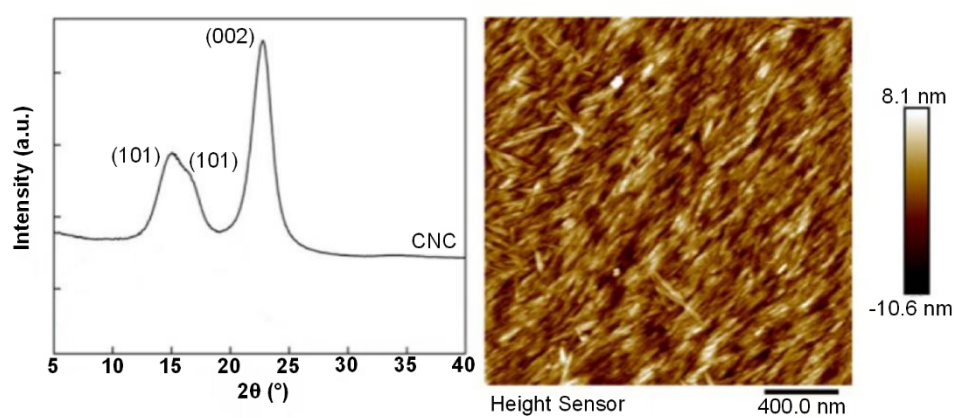

**Figure S2.** XRD pattern and AFM image of CNC.

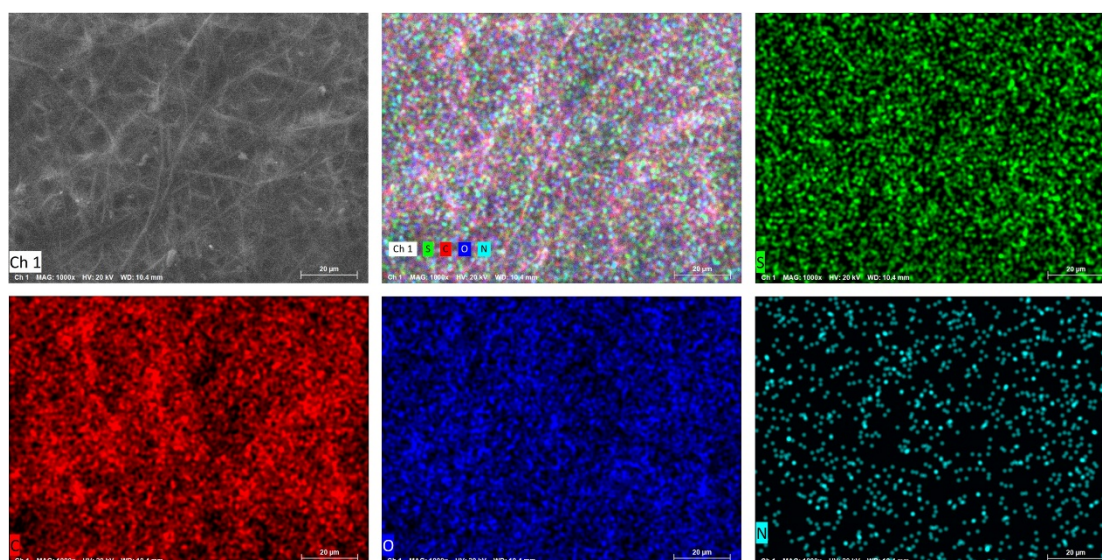

**Figure S3.** SEM image and EDS mapping analysis of CNC/PAN/PVA@GLU film.

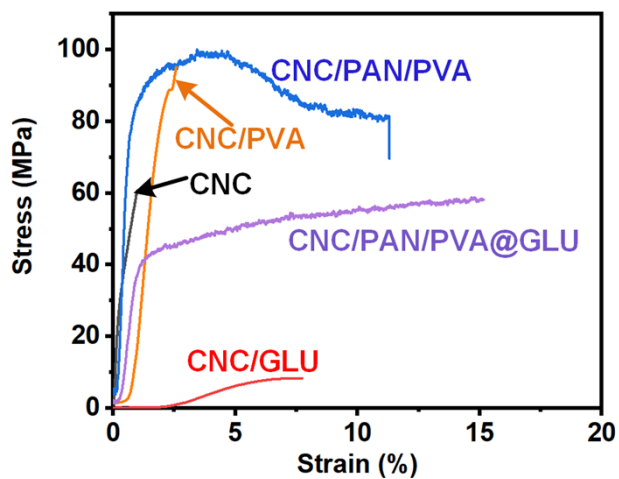

**Figure S4.** Stain-stress curves for CNC, CNC/PVA, CNC/GLU, CNC/PAN/PVA and CNC/PAN/PVA@GLU films.

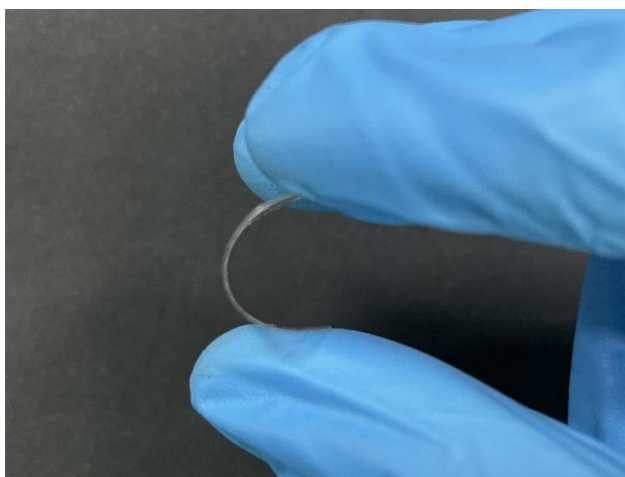

**Figure S5.** Photograph showing the good flexibility of CNC/PAN/PVA@GLU film.
